1 **Temporal cascade of frontal, motor and muscle processes underlying human**  
2 **action-stopping**

3

4 Sumitash Jana \*<sup>1</sup>, Ricci Hannah \*<sup>1</sup>, Vignesh Muralidharan<sup>1</sup>, and Adam R. Aron<sup>1</sup>

5

6 \* These authors contributed equally to the study

7

8 <sup>1</sup> Department of Psychology, University of California, San Diego

9

10 **Materials & Correspondence**

11 Correspondence and requests should be addressed to S.J. ([s2jana@ucsd.edu](mailto:s2jana@ucsd.edu)) or to R.H.

12 ([rhannah@ucsd.edu](mailto:rhannah@ucsd.edu))

13

14

## 15 **Abstract**

16           Action-stopping is a canonical executive function thought to involve top-down control  
17 over the motor system. Here we aimed to validate this stopping system using high temporal  
18 resolution methods in humans. We show that, following the requirement to stop, there was an  
19 increase of right frontal beta (~13 to 30 Hz) at ~120 ms, likely a proxy of right inferior frontal  
20 gyrus; then, at 140 ms, there was a broad skeletomotor suppression, likely reflecting the impact  
21 of the subthalamic nucleus on basal ganglia output; then, at ~160 ms, suppression was detected  
22 in the muscle, and, finally, the behavioral time of stopping was ~220 ms. This temporal cascade  
23 confirms a detailed model of action-stopping, and partitions it into subprocesses that are isolable  
24 to different nodes and are more precise than the behavioral speed of stopping. Variation in these  
25 subprocesses, including at the single-trial level, could better explain individual differences in  
26 impulse control.

27

28           The ability to control one's actions and thoughts is important for our daily lives; for  
29 example: changing gait when there is an obstacle in the path<sup>1</sup>, resisting the temptation to eat  
30 when on a diet<sup>2</sup>, overcoming the tendency to say something hurtful<sup>3</sup>. While many processes  
31 contribute to such forms of control, one important process is response inhibition – the prefrontal  
32 (top-down) stopping of initiated response tendencies<sup>4</sup>. In the laboratory, response inhibition is  
33 often studied with the stop-signal task<sup>5</sup>. On each trial, the participant initiates a motor response,  
34 and then, when a subsequent Stop signal occurs, tries to stop. From the behavioral data one can  
35 estimate a latent variable; the speed of stopping known as Stop Signal Reaction Time (SSRT),  
36 which is typically 200-250 ms in healthy adults<sup>5</sup>. SSRT has been useful in neuropsychiatry  
37 where it is often longer for patients vs. controls<sup>6-11</sup>. The task has also provided a rich test-bed,  
38

39 across species, for mapping out a putative neural architecture of prefrontal-basal-ganglia-regions  
40 for rapidly suppressing motor output areas<sup>6,12,13</sup>. Given this rich literature, this task is one of the  
41 few paradigms included in the longitudinal Adolescent Brain Cognitive Development study<sup>14</sup> of  
42 10,000 adolescents over 10 years.

43 Against this background, a puzzle is that the relation between SSRT and ‘real-world’  
44 self-reported impulsivity is often weak<sup>15–20</sup>. One explanation is that SSRT may not accurately  
45 index the brain’s true stopping speed. Indeed, recent mathematical modelling of behavior during  
46 the stop-signal task suggests that standard calculations of SSRT may overestimate the brain’s  
47 stopping speed by ~100 ms<sup>15</sup> [also see<sup>21</sup>]. Further, in a recent study<sup>22</sup>, electromyographic (EMG)  
48 recordings revealed an initial increase in EMG activity in response to the Go cue, followed by a  
49 sudden decline at ~150 ms after the Stop signal. This decline in EMG could be because of the  
50 Stop process ‘kicking in’ to cancel motor output – but the striking thing is that this was 50 ms  
51 before the SSRT of 200 ms. This timing is also consistent with experiments using transcranial  
52 magnetic stimulation (TMS) to measure the motor evoked potential (MEP) during the stop-signal  
53 task (the MEP indexes the excitability of the pathways from motor cortex to muscle). The MEP  
54 in the muscle that was-to-be-stopped reduced at ~150 ms<sup>23,24</sup>. Further, other studies that  
55 measured the MEP from muscles that were not needed for the task, show there is ‘global  
56 suppression’ also at ~150 ms<sup>25–28</sup> (*i.e.* corticospinal activity was suppressed for the broader  
57 skeletomotor system). This ‘global MEP suppression’ has been linked to activation of the  
58 subthalamic nucleus of the basal-ganglia<sup>29</sup>, which is thought to be critical for stopping, and might  
59 broadly inhibit thalamocortical drive<sup>30</sup>.

60 The potential overestimation of the brain’s true stopping speed by SSRT could arise for  
61 several reasons. First, the race model assumes that the Stop process is “triggered” on every trial.

62 But recent research shows that this is not the case<sup>15</sup>, and that failing to account for “trigger  
63 failures” inflates SSRT. Second, while the standard “race model” assumes that the Go and Stop  
64 processes are independent<sup>5</sup>, recent research show that violations of this independence can also  
65 inflate SSRT<sup>21</sup>. Finally, the standard ways of computing SSRT likely do not account for  
66 electromechanical delays between muscle activity and the response. In any event, overestimating  
67 the brain’s stopping speed would add variance to SSRT which could potentially weaken the  
68 above-mentioned across-participant associations between stopping speed and self-report  
69 scores<sup>15–17</sup>. Furthermore, if the true stopping speed is ~150 ms, the timing of activation of nodes  
70 in the putative response inhibition network should precede this time-point for those nodes to play  
71 a causal role in action stopping – and this is important for the interpretation of neuroscience  
72 studies. For instance, in electrocorticography and electroencephalography (EEG) studies,  
73 successful stopping elicits increased beta band power over right frontal cortex in the time period  
74 between the Stop signal and SSRT<sup>31–33</sup>. Whether this, and other, neurophysiological markers of  
75 the Stop process occur sufficiently early to directly contribute to action-stopping (if SSRT is  
76 overestimated) is unknown; yet this is fundamental to our understanding of brain networks  
77 underlying response inhibition.

78 Here we leveraged the insight from the above-mentioned study<sup>22</sup> which used EMG of the  
79 task relevant muscles. We now tested whether we could derive a single trial estimate of stopping  
80 speed from EMG (referred to as CancelTime). More specifically, we hypothesized that ‘partial’  
81 EMG bursts on the Successful Stop trials (*i.e.* small EMG responses that begin but do not reach a  
82 sufficient amplitude to lead to an overt response)<sup>34</sup> would carry information about the latency of  
83 stopping and tested this in two studies. In a third study we tested if CancelTime would  
84 correspond with the measure of putative basal ganglia-mediated global motor suppression,

85 measured with single-pulse TMS. In studies four and five we turned to the cortical process  
86 thought to initiate action–stopping, using the above-mentioned proxy of right frontal beta<sup>31,32</sup>.  
87 We measured scalp EEG, derived a right frontal spatial filter in each participant, and then  
88 extracted beta bursts<sup>35</sup> in the time period between the Stop signal and SSRT. We tested how the  
89 timing of these beta bursts related to CancelTime.

90

## 91 **Results**

92 **Study 1 (EMG).** 10 participants performed the stop-signal task (Fig. 1a). On each trial they  
93 initiated a manual response when a Go cue occurred, and then had to try to stop when a Stop  
94 signal suddenly appeared on a minority of trials. Depending on the stop signal delay, SSD,  
95 participants succeeded or failed to stop, each ~50% of the time). We measured EMG from the  
96 responding right index and little fingers (Fig. 1b *inset*). Behavioral performance was typical, with  
97 SSRT (referred to as SSRT<sub>Beh</sub>) of 216±8 ms, and action-stopping on 51±1 % of Stop trials (Table  
98 1). EMG analysis was performed on the trial-by-trial root-mean-squared EMG (EMG<sub>RMS</sub>; Fig.  
99 1b). On 53±6 % of Successful Stop trials (*i.e.* where no keypress was made) there was a small  
100 but detectible EMG response (Partial EMG trials; see Supplementary Fig. 1a, b for EMG-RT  
101 correlation), while on the remainder of Successful Stop trials there was no detectible EMG  
102 response (No EMG trials). The amplitude of EMG responses (mean peak EMG voltage) in the  
103 Partial EMG trials was 48±3% smaller than in trials with a keypress (Fig. 2a).

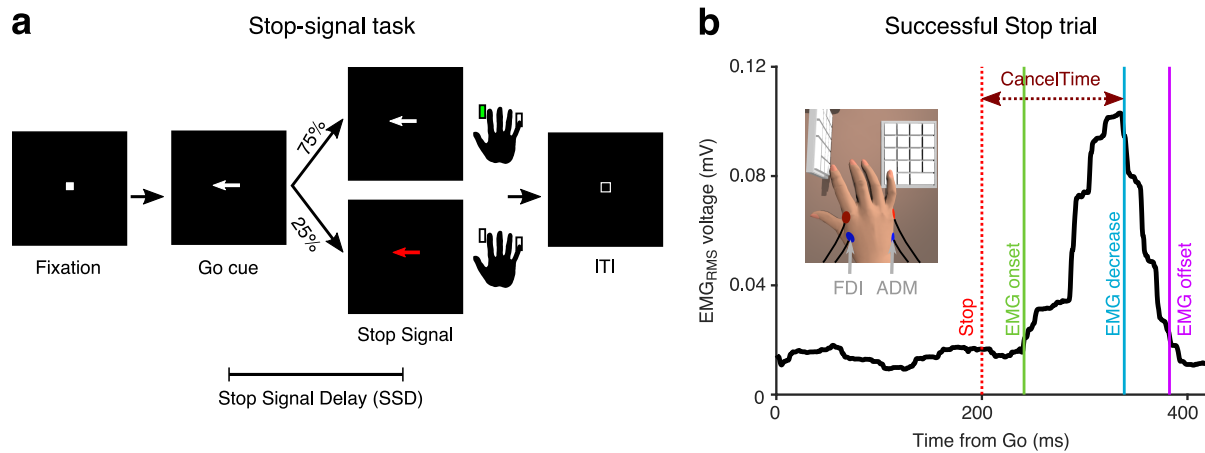

104

105

106

107

108

109

110 **Table 1: Behavior** (mean±s.e.m.; All values in ms)

|                     | Study 1<br>(EMG) | Study 2<br>(EMG) | Study 3<br>(TMS) | Study 4<br>(EEG) | Study 5<br>(EEG) |
|---------------------|------------------|------------------|------------------|------------------|------------------|
| Go RT               | 470 (15)         | 493 (15)         | 430 (17)         | 427 (15)         | 405 (6)          |
| Failed Stop RT      | 416 (11)         | 447 (14)         | 391 (12)         | 384 (12)         | 370 (5)          |
| Correct Go %        | 97 (1)           | 98 (0)           | 99 (0)           | 99 (0)           | 99 (0)           |
| Correct Stop %      | 51 (1)           | 52 (1)           | 49 (1)           | 48 (1)           | 50 (0)           |
| Mean SSD            | 237 (20)         | 280 (17)         | 194 (18)         | 191 (21)         | 170 (7)          |
| SSRT <sub>Beh</sub> | 216 (8)          | 204 (4)          | 219 (6)          | 214 (9)          | 219 (6)          |

111

112

113

114

115

We hypothesized that the time when the Partial EMG response starts declining after the Stop signal is a readout of the time when the Stop process is implemented in the muscle (hereafter ‘CancelTime’). We observed that, first, CancelTime is much earlier than SSRT<sub>Beh</sub> (see Fig. 2c (left) for all CancelTimes in an exemplar participant; mean CancelTime = 146±3 ms,

116 SSRT<sub>Beh</sub> = 203 ms); and second, across participants, CancelTime was positively correlated with  
117 SSRT<sub>Beh</sub> (Fig. 2d; study 1: mean CancelTime = 152±11 ms, mean SSRT<sub>Beh</sub> = 216±8 ms;  $r =$   
118 0.71,  $p = 0.020$ ,  $BF_{10} = 3.6$ ). This suggests that CancelTime might index the time when Stopping  
119 is implemented at the muscle.  
120

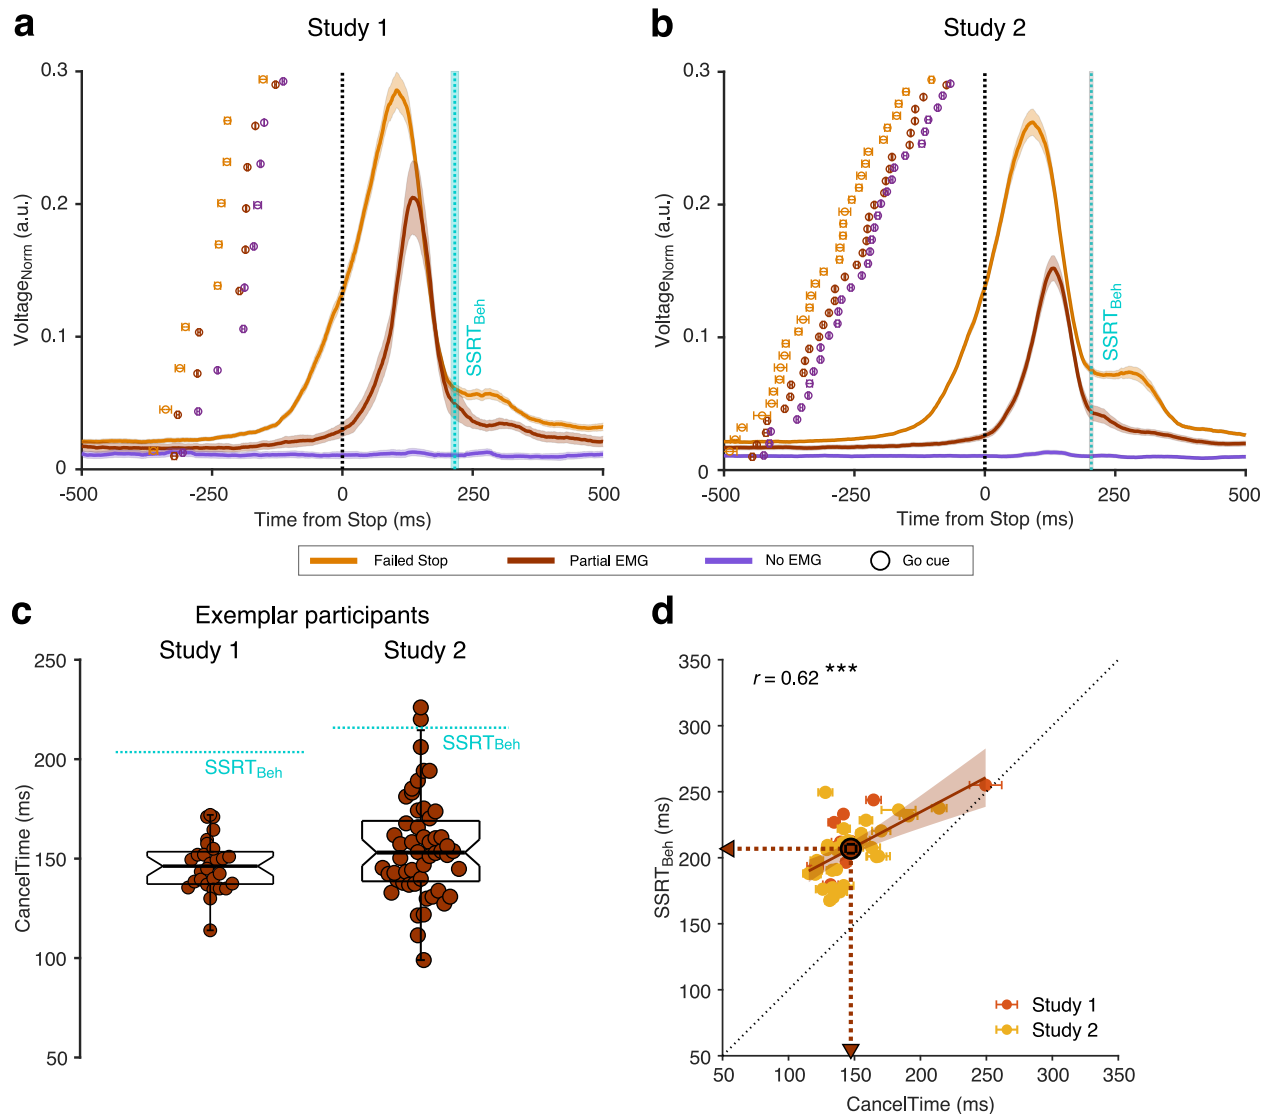

121  
122 **Figure 2 | EMG responses in study 1 and 2. (a)** Normalized EMG<sub>RMS</sub> voltage in Failed Stop  
123 (orange), Partial EMG (brown), and No EMG trials (purple), aligned to the Stop signal. The lines and  
124 the shaded area represent the mean±s.e.m. across participants. The dotted cyan line and shaded area

125 represent the mean $\pm$ s.e.m of SSRT<sub>Beh</sub> across participants. The dots and cross-hairs represent the  
126 mean $\pm$ s.e.m. of the Go cue in a participant. Note that the time between the Go cue and the Stop signal  
127 (i.e. the SSD) is shortest for the No EMG (purple), then the Partial EMG (brown), and then the Failed  
128 Stop trials (orange). **(b)** Same as (a) but for Study 2. **(c)** (*Right*) Beeswarm plot of the CancelTime in  
129 an exemplar participant from Study 1. Each dot represents a trial. The dotted cyan line represents the  
130 SSRT<sub>Beh</sub>. (*Left*) Same as *right* but for Study 2. **(d)** Correlation between CancelTime and SSRT<sub>Beh</sub> in  
131 Study 1 (light red) and Study 2 (yellow). The brown dot, lines and arrows represent the means, while  
132 the black dotted line represents the unity line. The linear regression fit and its 95% confidence interval  
133 (pooled study 1 and 2) is shown as a brown line and shaded region respectively.

134 **Study 2 (EMG).** We then ran a new sample ( $n = 32$ ; see Table 1 for behavioral results). Again,  
135 we observed partial EMG responses on  $49\pm 2$  % of Successful Stop trials; where the EMG  
136 amplitude was  $54\pm 1$  % smaller than the amplitude in trials with a keypress (Fig. 2b). Fig. 2c  
137 (*right*) shows the distribution of CancelTimes in an exemplar participant (mean CancelTime =  
138  $156\pm 4$  ms, SSRT<sub>Beh</sub> = 218 ms). Again, across participants, mean CancelTime was positively  
139 correlated with SSRT<sub>Beh</sub> (Fig. 2d; mean CancelTime =  $146\pm 4$  ms, mean SSRT<sub>Beh</sub> =  $204\pm 4$  ms;  $r$   
140 = 0.59,  $p < 0.001$ ,  $BF_{10} = 71.7$ ). Intriguingly, in each study, CancelTime was  $\sim 60$  ms less than  
141 SSRT<sub>Beh</sub>. To further explore this, we pooled the data across the 2 studies.

142  
143 **Pooled studies 1 and 2.** Mean CancelTime ( $147\pm 5$  ms) was  $60\pm 3$  ms shorter than SSRT<sub>Beh</sub>  
144 ( $t(41) = 18.4$ ,  $p < 0.001$ ,  $d = 2.5$ ,  $BF_{10} > 100$ ). We then tested whether we could calculate SSRT  
145 using the presence of EMG responses (SSRT<sub>EMG</sub>) instead of the keypress responses (SSRT<sub>Beh</sub>).  
146 We considered Partial EMG trials as Failed Stop trials and used EMG onset time on Correct Go  
147 trials to recalculate SSRT (i.e. instead of using P(Respond|Stop) from behavior and Go RT as is



148 typical for  $SSRT_{Beh}$  calculations; see Methods; see Fig. 3a for an exemplar participant). We then  
149 performed 1-way repeated measures ANOVA with “Stop Time” as the dependent measure and  
150 the method of estimation as a factor ( $SSRT_{EMG}$ ,  $SSRT_{Beh}$ , and CancelTime). There was a  
151 significant main effect of the estimation method on “Stop Time” ( $F_{GG}(1.4, 56.1) = 66.3, p <$   
152  $0.001, \eta_p^2 = 0.6$ ). Pairwise comparisons showed that  $SSRT_{EMG}$  ( $157 \pm 7$  ms) was significantly  
153 faster than  $SSRT_{Beh}$  ( $209 \pm 3$  ms) (Fig. 3b;  $t(41) = 8.2, p_{Bon} < 0.001, d = 1.3, BF_{10} > 100$ ), but  
154 importantly, not significantly different from mean CancelTime ( $t(41) = 1.5, p_{Bon} = 0.270, d = 0.2,$   
155  $BF_{10} = 0.5$ ). This suggests that  $SSRT_{Beh}$  might be protracted by a peripheral delay and that  
156 CancelTime might be a better metric of the time of implementation of the Stop process.

157         Next, we examined in more detail the EMG profile on Partial EMG trials. Across all  
158 participants, the EMG response in the Partial EMG trials (when aligned to the EMG onset) had a  
159 profile similar to the EMG response in the Correct Go and Failed Stop trials, but diverged ~55  
160 ms after EMG onset (55 ms compared to Correct Go, and 56 ms compared to Failed Stop trials,  
161 Fig. 3c). We surmised that if the Partial EMG trials reflect responses that have been actively  
162 cancelled at the muscle-level, then the amplitude of these responses should increase with SSD.  
163 The rationale was that, at shorter SSDs, the Go process will have been active for a shorter  
164 duration, meaning EMG activity will not have increased much before being inhibited, while at  
165 longer SSD, the Go process will have been active for a longer duration, meaning EMG activity  
166 will have increased much more before being inhibited. Indeed, the amplitude of the Partial EMG  
167 responses increased with SSD (Supplementary Fig. 1c). A 1-way repeated measures ANOVA  
168 with amplitude as the dependent variable and the SSD as the independent variable showed  
169 significant effect of SSD on amplitude ( $F(4,24) = 3.7, p = 0.018, \eta_p^2 = 0.4$ ) [also see<sup>23</sup>]. This

170 suggests that the Partial EMG trials represent inhibited Go responses and not merely a weak Go  
171 process (which would presumably not increase across SSDs).

172 To further validate CancelTime, we modelled the behavior using BEESTS (Bayesian  
173 Estimation of Ex-gaussian STop-Signal reaction time distributions; see Table 2 for model  
174 estimates). While  $SSRT_{Beh}$  produces a single estimate per person, BEESTS uses a Bayesian  
175 parametric approach to estimate the distribution of SSRTs<sup>36</sup>. Also, for each participant, it  
176 provides an estimate of the probability of trigger failures (*i.e.* stop trials where the stopping  
177 process was not initiated<sup>36</sup>). Across participants, mean CancelTime was positively correlated  
178 with the mean  $SSRT_{BEESTS}$  ( $205 \pm 3$  ms;  $r = 0.54$ ,  $p < 0.001$ ,  $BF_{10} > 100$ ; Fig. 3d). More  
179 interestingly, the SD of CancelTime ( $33 \pm 2$  ms) was positively correlated with the SD of  
180  $SSRT_{BEESTS}$  ( $48 \pm 5$  ms;  $r = 0.42$ ,  $p = 0.005$ ,  $BF_{10} = 6.9$ ; Fig. 3e). Further, the percentage of trigger  
181 failures ( $4 \pm 1\%$ ) was positive correlated with mean CancelTime ( $\rho = 0.57$ ,  $p < 0.001$ ,  $BF_{10} > 100$ )  
182 suggesting that participants who fail to “trigger” the Stop process more often, have longer  
183 CancelTimes (Fig. 3f). These relationships between CancelTime and model estimates give  
184 further credence to our interpretation that CancelTime on Partial EMG trials reflects a single-trial  
185 measure of the time of implementation of the Stop process.

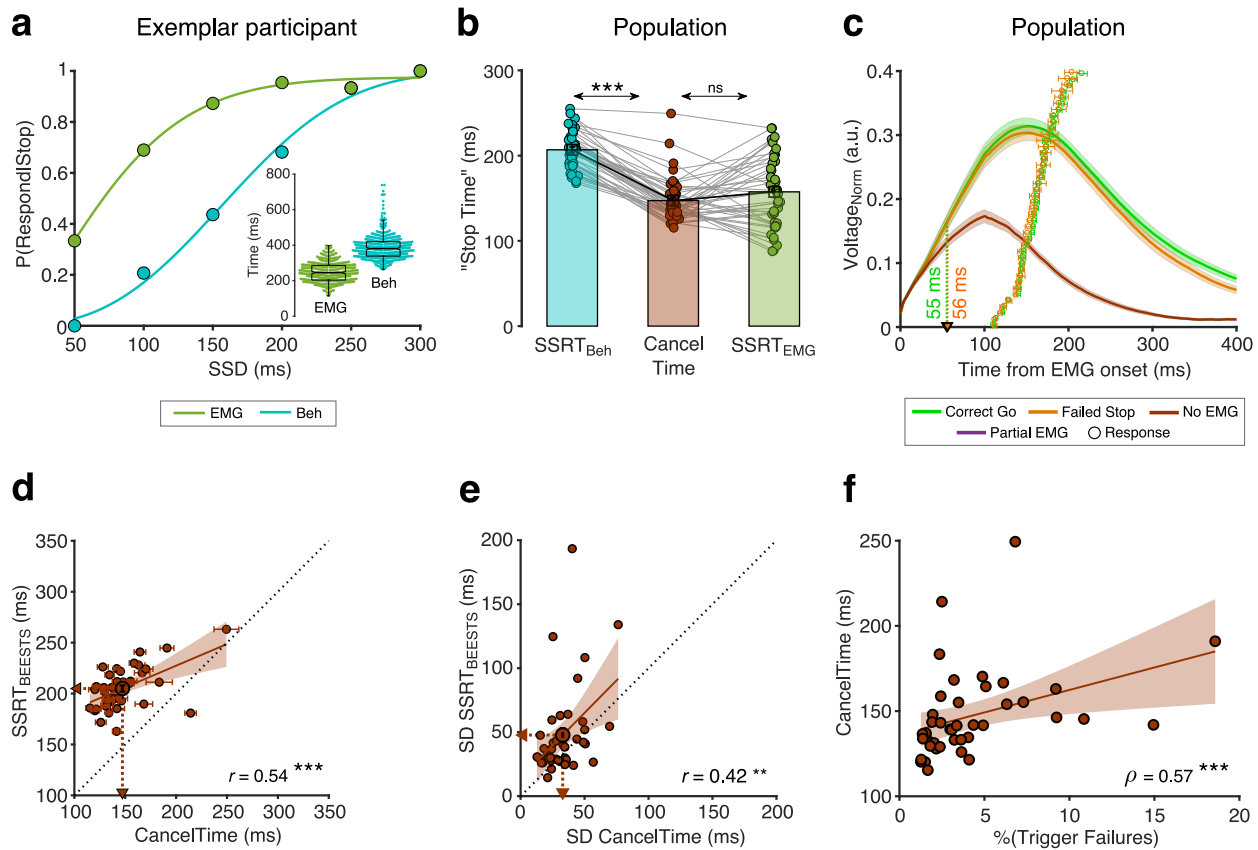

186

187 **Figure 3 | Peripheral delay associated with  $SSRT_{Beh}$  and relationship between CancelTime and**

188 **BEESTS parameters. (a)**  $P(\text{Respond}|\text{Stop})$  in an exemplar participant calculated using the behavioral

189 response (dark green dots) and the EMG response (cyan dots). The lines represent the cumulative

190 Weibull fit as  $W(t) = \gamma - (\gamma - \delta)e^{[-(t/\alpha)^\beta]}$  where where  $t$  is the SSD,  $\alpha$  is the time at which the

191 function reaches 64% of its full growth,  $\beta$  is the slope,  $\delta$  is the minimum value of the function, and  $\gamma$

192 is maximum value of the function. The difference between  $\delta$  and  $\gamma$  marks range of the function.

193 (*Inset*) Beeswarm plot of the EMG onset (dark green) and the behavioral responses (cyan) used to

194

195 calculate  $SSRT_{EMG}$  and  $SSRT_{Beh}$  respectively. (b) Comparison of the  $SSRT_{Beh}$  (cyan), CancelTime

196

197 (brown), and  $SSRT_{EMG}$  (dark green) across all participants. Each dot represents a participant, while the

198

199 bar and cross-hair represents the  $\text{mean} \pm \text{s.e.m.}$  in a group. (c) The normalized EMG responses aligned

200

201 to the detected EMG onsets in the Correct Go (dark green), Failed Stop (orange), and Partial EMG

202

203 (brown) trials. The line and shaded region represent the  $\text{mean} \pm \text{s.e.m.}$  in a group. The dots and cross

204  
205 hairs represent the mean $\pm$ s.e.m. of the keypress in a participant. (d) Correlation between CancelTime  
206  
207 and mean SSRT<sub>BEESTS</sub> estimate. Each dot and cross-hair represent the mean $\pm$ s.e.m. in a participant.  
208  
209 The brown line and the shaded area represent the linear regression fit and its 95% confidence  
210  
211 interval. The unity line is represented as a dotted black line. (e) Correlation between CancelTime and  
212  
213 SD of the SSRT<sub>BEESTS</sub> estimate. Other details same as (d). (f) Correlation between percentage Trigger  
214  
215 Failures estimated from BEESTS and CancelTime. Other details same as (d).  
216  
217

218 **Table 2: BEESTS estimates** (mean $\pm$ s.e.m.; All values in ms)  
219

| Estimated parameters | Pooled study 1 & 2 |
|----------------------|--------------------|
| Mean Go RT           | 483 (13)           |
| SD Go RT             | 94 (5)             |
| Mean SSRT            | 205 (3)            |
| SD SSRT              | 48 (5)             |
| %Trigger Failures    | 4 (1)              |

220  
221 **Study 3 (TMS).** To further validate CancelTime and relate it to brain processes we turned to a  
222 different method – single-pulse TMS over a task-irrelevant muscle representation in the brain. As  
223 mentioned above, the reduction of MEPs from task-irrelevant muscles on Successful Stop  
224 trials<sup>25–27</sup>, is thought to reflect a basal ganglia-mediated global suppression<sup>29</sup>. Eighteen new  
225 participants (see Table 1 for behavioral results) now performed the task with their left hand,  
226 while TMS was delivered over the left motor cortex and MEPs were recorded from a task-  
227 irrelevant, right forearm muscle. MEPs were recorded at different times after the Stop signal on  
228 different trials: 100 – 180 ms in 20 ms intervals, as well as during the inter-trial interval which  
229 served as a baseline. Concurrently, we recorded EMG from the task-relevant left-hand muscles  
230 as for studies 1 and 2 above (Fig. 4a).

231 The key TMS finding, in keeping with earlier studies<sup>25-27</sup>, was of suppression of MEPs in  
232 the task-irrelevant forearm, indicating global motor system suppression, beginning ~140 ms  
233 following the Stop signal in Successful Stop trials (Fig. 4b) [see Supplementary Fig. 2 for MEP  
234 amplitudes for Partial EMG and No EMG trials separately]. A 2-way repeated measures  
235 ANOVA with MEP amplitude as the dependent measure and the factors of trial-type (Correct  
236 Go, Successful Stop, Failed Stop) and time (100, 120, 140, 160, 180 ms after the Stop signal)  
237 showed main effects of both trial-type ( $F(2,32) = 7.2, p = 0.003, \eta_p^2 = 0.3$ ) and time ( $F_{GG}(2.5,$   
238  $40.7) = 4.8, p = 0.008, \eta_p^2 = 0.2$ ), as well as an interaction of trial-type by time ( $F(8, 128) = 3.4,$   
239  $p = 0.002, \eta_p^2 = 0.2$ ). Post hoc *t*-tests across Successful Stop and Correct Go trials showed *no*  
240 difference at 100 ms ( $t(16) = 0.7, p_{Bon} = 1.0, BF_{10} = 0.3$ ), 120 ms ( $t(16) = 2.5, p_{Bon} = 0.066, BF_{10}$   
241  $= 2.8$ ), and 160 ms ( $t(16) = 2.1, p_{Bon} = 0.159, BF_{10} = 1.4$ ). However, MEP amplitudes *were*  
242 significantly suppressed on Successful Stop trials at 140 ms ( $t(16) = 4.1, p_{Bon} = 0.003, BF_{10} =$   
243  $39.8$ ) and 180 ms ( $t(16) = 4.4, p_{Bon} < 0.001, BF_{10} = 65.2$ ) after the Stop signal. Therefore, we  
244 estimate the onset of the global motor suppression to be ~140 ms after the Stop signal, which  
245 places it ~15 ms prior to the mean CancelTime ( $155 \pm 7$  ms). There were no significant  
246 differences in MEP amplitudes between Failed Stop and Correct Go trials at any time point,  
247 though MEP amplitudes on Successful Stop trials were also suppressed compared to Failed Stop  
248 trials at 160 ms ( $t(16) = 2.9, p_{Bon} = 0.033, BF_{10} = 4.9$ ).

249 It makes sense that global motor suppression occurs before CancelTime as motor cortical  
250 output takes time to be transmitted along the corticospinal pathway to the muscles. To verify  
251 whether the ~15 ms discrepancy in timings could be accounted for by corticospinal conduction  
252 delays, we estimated this corticospinal conduction time in a separate phase of the current study  
253 by delivering TMS over the hand representation to evoke MEPs in the left, task-relevant, FDI

254 muscle (Fig. 4c). This was  $23 \pm 0.3$  ms. Thus, a decline in muscle activity would be expected to  
255 be preceded by a reduction in motor cortical output by  $\sim 23$  ms, which is very similar to the  $\sim 15$   
256 ms difference between global motor suppression and CancelTime.

257 To further elaborate the temporal relationship between global motor suppression and  
258 CancelTime, we performed a trial-by-trial analysis whereby MEP amplitudes were sorted  
259 according to the time at which TMS was delivered, relative to the time at which EMG decreased  
260 on Successful Stop, Failed Stop and Correct Go trials (Fig. 4d). The suppression of MEPs in  
261 Successful Stop trials compared to Correct Go trials began in the 30 ms prior to the EMG decline  
262 (-30 to 0 ms:  $Z = 3.12$ ,  $p_{Bon} = 0.005$ ; 0 to 30 ms:  $Z = 4.48$ ,  $p_{Bon} < 0.001$ ; 30 to 60 ms:  $Z = 2.45$ ,  
263  $p_{Bon} = 0.045$ ). This lag in the time of EMG decrease relative to the time of the MEP suppression  
264 on Successful Stop trials can again be accounted for by the corticospinal conduction time. Thus,  
265 these results imply that the brain output to task-relevant muscles declines at approximately the  
266 same time as the global motor suppression begins.

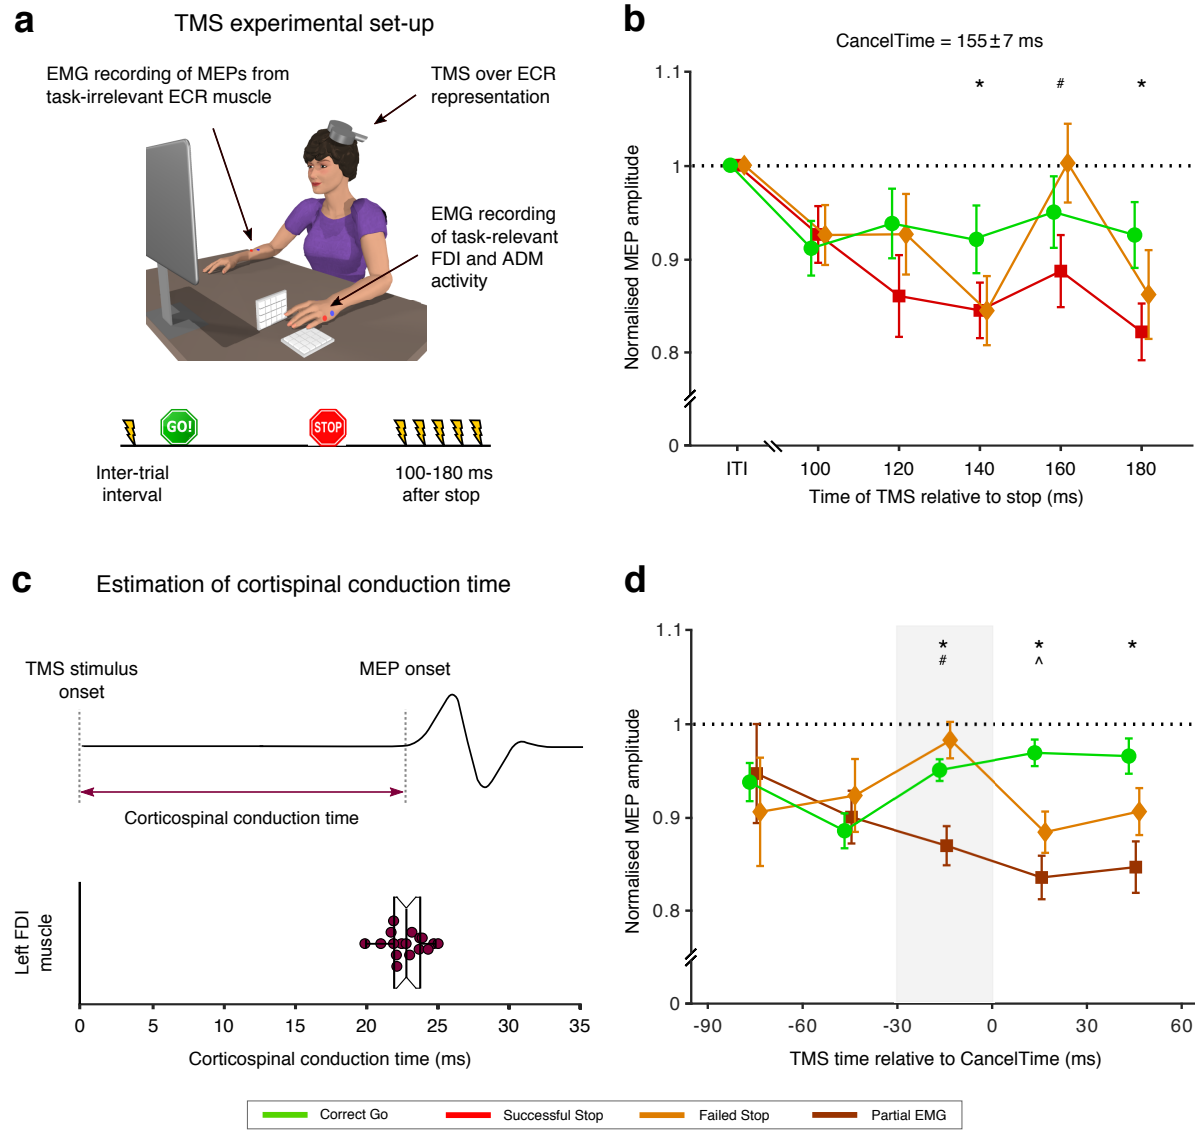

267

268 **Figure 4 | Relationship between global motor system suppression and CancelTime. (a)**

269 Experimental set up and TMS stimulus timings for study 3. Participants performed the Stop signal

270 task with the left hand with concurrent EMG measurement of CancelTime from task-relevant muscles

271 FDI and ADM muscle. On a given trial, a single TMS stimulus over left M1 was delivered at one of 6

272 possible times to elicit a motor evoked potential (MEP) in the task-irrelevant extensor carpi radialis

273 (ECR) muscle of the right forearm. (b) Global motor system suppression begins at 140 ms after the

274 Stop signal, and thus ~15 ms prior to the mean CancelTime. Paired *t*-tests: \*,  $p_{Bon} < 0.05$  Successful

Stop (red) vs. Correct Go (green); #,  $p_{Bon} < 0.05$  Successful Stop vs. Failed Stop (orange). The black

275 dotted line shows amplitude of MEPs normalized to those at the inter-trial interval. (c) (*Top*) Schematic  
276 representation of an MEP. (*Bottom*) Beeswarm plot of the mean corticospinal conduction time to a hand  
277 muscle was established by measuring the onset latency of MEPs in the hand, and was ~23 ms on  
278 average. Each dot represents a participant. This conduction time is included in CancelTime. (d) Trial-  
279 by-trial analysis of MEP amplitudes organized into 30 ms time bins reflecting the time of TMS  
280 expressed relative to the CancelTime. Global motor system suppression begins in a window 30-0 ms  
281 prior to the CancelTime (gray shaded region). Wilcoxon rank sum test: \*,  $p_{Bon} < 0.05$  Partial EMG  
282 (brown) vs. Correct Go (green); #,  $p_{Bon} < 0.05$  Partial EMG vs. Failed Stop (orange); ^,  $p_{Bon} < 0.05$   
283 Failed Stop vs. Correct Go. The black dotted line shows amplitude of MEPs normalized to those at the  
284 inter-trial interval.

285 **Study 4 (EEG).** Having established that CancelTime reflects the time of an active stopping  
286 process at the muscle (Studies 1 and 2, EMG/behavior), which also related tightly with the  
287 timing of global motor suppression (Study 3, TMS), we then tested whether this EMG measure  
288 was also related to the timing of a prefrontal correlate of action-stopping, specifically the  
289 increase of beta power (13-30 Hz) before SSRT<sub>Beh</sub> at right frontal electrode sites<sup>32,33</sup>. We now  
290 measured scalp EEG as well as EMG from the hand, in 11 participants (see Table 1 for  
291 behavioral results). We derived beta bursts rather than beta power *per se*, as bursts have richer  
292 features<sup>37</sup>, such as burst timing and duration.

293 To identify right frontal electrodes of interest in each participant (*i.e.* a spatial filter), we  
294 used Independent Components Analysis<sup>38</sup> [see<sup>32,33</sup>]. We selected a participant-specific  
295 independent component (IC) based on two criteria; First, the scalp topography (right-frontal, and  
296 if not present, frontal); and Second, an increase in beta power on Successful Stop trials (from  
297 Stop signal to SSRT<sub>Beh</sub>; Stop<sub>Win</sub>) compared to activity *prior to the Go* cue [-1000 to -500 ms



298 aligned to the Stop signal; see Methods; Supplementary Fig. 3]. The average scalp topography  
299 across all participants is shown in Fig. 5b *inset*. For each participant, we estimated beta bursts;  
300 First, by filtering the data at the peak beta frequency; and Second, by defining a burst threshold  
301 based on the beta amplitude in a baseline period *after* the Stop signal (500-1000 ms after Stop  
302 signal in the Stop trials, and 500-1000 ms after the mean SSD in the Correct Go trials) (see  
303 Methods; Supplementary Fig 4).

304 In an exemplar participant, the burst % increased for Successful Stop compared to both  
305 Failed Stop and Correct Go trials prior to SSRT<sub>Beh</sub> (Fig. 5a). To quantify this across participants,  
306 we compared the mean burst % among the 3 trial-types, and for the time window from the Stop  
307 signal to the SSRT<sub>Beh</sub> of a participant (Stop<sub>win</sub>) and the baseline period *before the Stop* signal  
308 (Base<sub>win</sub>; Go to Stop signal in Stop trials and Go to mean SSD in Correct Go trials). We  
309 performed a 2-way repeated measures ANOVA with mean burst % as the dependent measure,  
310 with trial-type (Successful, Failed Stop, and Correct Go trials) and time-window (Stop<sub>win</sub> and  
311 Base<sub>win</sub>) as factors. There was a significant main effect of trial-type ( $F(2,20) = 4.5, p = 0.025,$   
312  $\eta_p^2 = 0.3$ ) and a trial-type by time-window interaction ( $F(2,20) = 4.0, p = 0.034, \eta_p^2 = 0.3$ ), but no  
313 main effect of time-window ( $F(1,10) = 3.8, p = 0.088, \eta_p^2 = 0.3$ ). Post hoc *t*-tests showed that in  
314 the Stop<sub>win</sub> there was a significant increase in burst % for Successful Stop ( $14.6 \pm 1.7\%$ )  
315 compared to both its baseline ( $9.9 \pm 1.7\%$ ;  $t(10) = 3.3, p_{Bon} = 0.022, BF_{10} = 7.6$ ), and Correct Go  
316 ( $9.6 \pm 1.3\%$ ;  $t(10) = 3.7, p_{Bon} = 0.015, BF_{10} = 11.8$ ), but not to Failed Stop ( $10.3 \pm 1.6\%$ ;  $t(10) =$   
317  $2.1, p_{Bon} = 0.198, BF_{10} = 1.2$ ) (Fig. 5b). Thus, burst % increased for the Successful Stop trials.

318 To further clarify the temporal relationship between beta activity and our EMG measure  
319 of action-stopping, we quantified the mean burst time (BurstTime in the Stop<sub>win</sub>) for each  
320 participant. Across participants, the mean BurstTime ( $115 \pm 6$  ms) was significantly shorter than

321 mean CancelTime ( $169 \pm 10$  ms;  $t(10) = 8.2$ ,  $p < 0.001$ ,  $BF_{10} > 100$ ) and there was also a strong  
 322 positive relationship between them ( $\rho = 0.76$ ,  $p = 0.006$ ,  $BF_{10} = 10.6$ ; Fig. 5d) [see  
 323 Supplementary Fig. 5 for correlation between CancelTime and other burst parameters]. Further,  
 324 we show that the observed correlation was not merely an artifact of varying Stop<sub>win</sub> across  
 325 participants (permutation test,  $p < 0.05$ ; see Methods). Thus, these results show that participants  
 326 with an early frontal beta burst also had an early CancelTime.  
 327

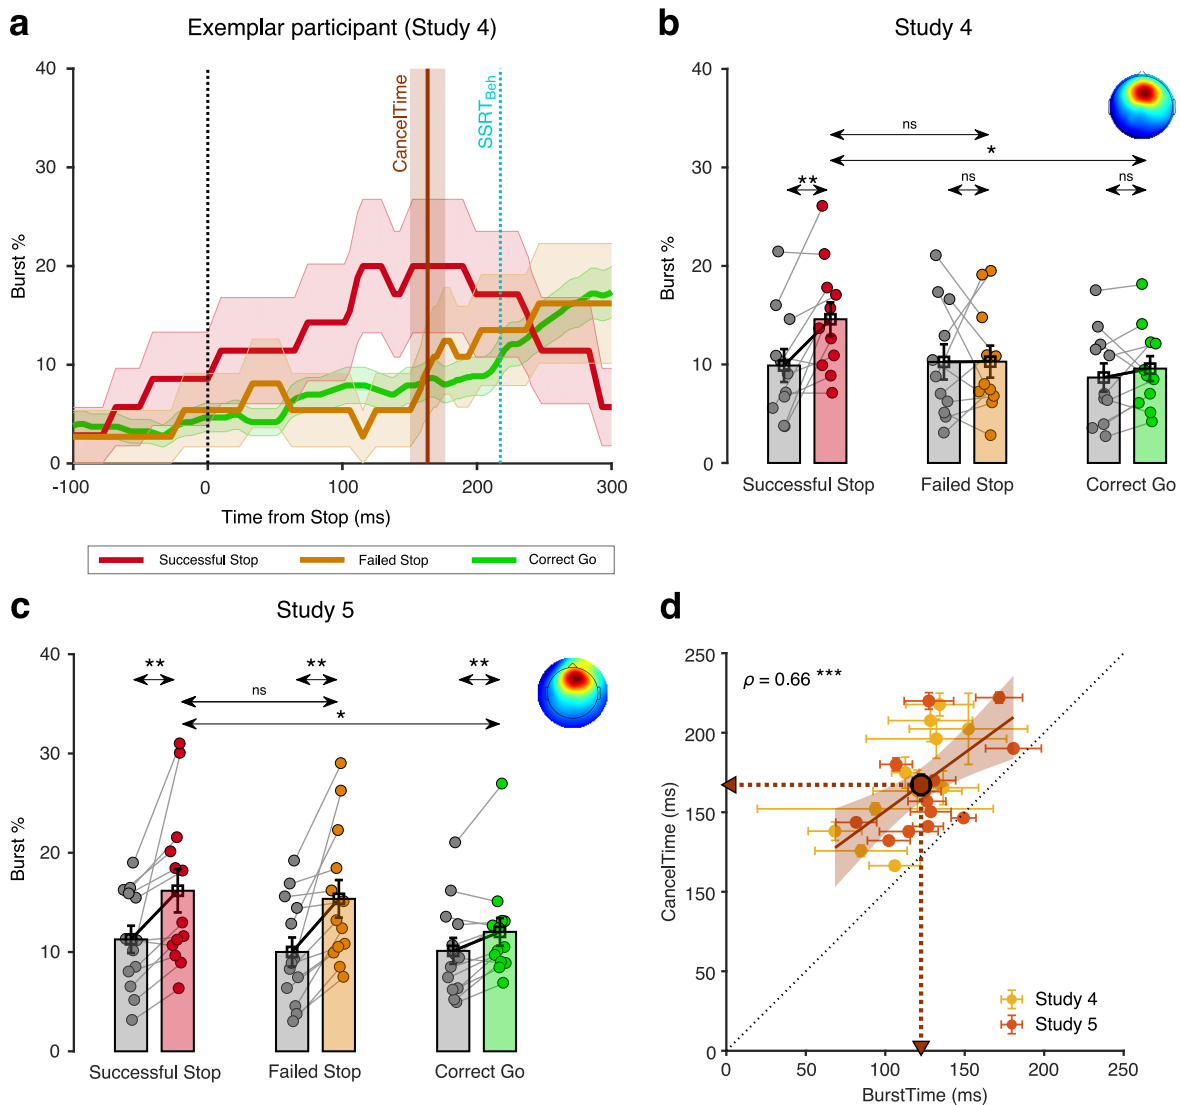

328

329

330 **Figure 5 | Relationship between scalp EEG beta bursts and CancelTime (study 4 and 5).** (a) Burst  
331 % across time for Successful Stop (red), Failed Stop (orange), and Correct Go (green) trials for an  
332 exemplar participant in study 4 from the right frontal spatial filter. The shaded region represents  
333 mean $\pm$ s.e.m. The CancelTime is shown in brown and the SSRT<sub>Beh</sub> as a cyan line. (b) The mean burst  
334 probability across all participants for Successful Stop (red), Failed Stop (orange), and Correct Go  
335 (green) trials and their respective baselines (gray). The bars and cross-hairs represent the mean and  
336 s.e.m across participants, while the dots represent individual participants. (*Inset top right*) The  
337 average scalp topography of all the right frontal ICs across all participants. (c) Same as (b) but for  
338 study 5. (d) Correlation between mean BurstTime and mean CancelTime. The yellow dots and cross-  
339 hairs represent the participants in study 4, while the light red ones represent participants in study 5. The  
340 brown line and the shaded area represent the linear regression fit and its 95% confidence interval  
341 (pooled study 4 and 5). Other details same as Fig. 2d.

342 **Study 5 (EEG replication):** We ran a new sample of 13 participants (see Table 1 for behavioral  
343 results). As above a right frontal IC was extracted for each participant (average topography Fig.  
344 5c *inset*, see Supplementary Fig 3) and the burst % was compared for the 3 trial-types  
345 (Successful Stop, Failed Stop, and Correct Go) in the two time-windows (Stop<sub>Win</sub> and Base<sub>Win</sub>).  
346 Again, a 2-way repeated measures ANOVA with burst % as the dependent measure revealed that  
347 there was a significant main effect of trial-type ( $F(2,24) = 6.9, p = 0.004, \eta_p^2 = 0.4$ ) and a trial-  
348 type by time-window interaction ( $F(1,12) = 5.8, p = 0.009, \eta_p^2 = 0.3$ ; Fig. 5c). Here there was  
349 also a significant effect of time-window on burst % ( $F(1,12) = 16.1, p = 0.002, \eta_p^2 = 0.6$ ). Post-  
350 hoc *t*-tests confirmed that the burst % was greater for Successful Stop (16.2 $\pm$ 2.2 %) compared to  
351 its baseline (11.3 $\pm$ 1.4 %;  $t(12) = 3.3, p_{Bon} = 0.021, BF_{10} = 7.6$ ), and Correct Go (12.0 $\pm$ 1.4 %;  
352  $t(12) = 3.0, p_{Bon} = 0.030, BF_{10} = 5.3$ ) but not compared to Failed Stop (15.4 $\pm$ 1.4 %;  $t(12) = 1.0,$

353  $p_{Bon} = 0.957$ ,  $BF_{10} = 0.34$ ). Across participants, the mean BurstTime ( $129 \pm 7$  ms) was again  
354 significantly shorter than CancelTime ( $166 \pm 8$  ms;  $t(10) = 5.0$ ,  $p < 0.001$ ,  $BF_{10} > 100$ ) and there  
355 was a significant positive relationship ( $\rho = 0.57$ ,  $p = 0.045$ ,  $BF_{10} = 1.9$ ; Fig. 5d). Again, a  
356 permutation test suggested that this correlation was unlikely to result from mere variation in the  
357 length of Stop<sub>Win</sub> across participants ( $p < 0.05$ ). Combining data from studies 4 and 5 confirms  
358 the strong relationship between right frontal beta BurstTime and CancelTime ( $\rho = 0.66$ ,  $p <$   
359  $0.001$ ,  $BF_{10} = 29.4$ ).

360

## 361 Discussion

362 This set of studies provides detailed information about the timing of subprocesses in  
363 human action-stopping. We started with the recently published observations that the standard  
364 behavioral measure of action-stopping (SSRT) is, an over-estimate of stopping speed<sup>15,21,22</sup>. To  
365 more precisely delve into this, we developed and validated a trial-by-trial method for estimating  
366 stopping speed from EMG. We focused on Successful Stop trials with small impulses (partial  
367 bursts) in EMG activity. The amplitude of such partial EMG activity was ~50% of the amplitude  
368 of EMG activity for outright keypresses, and this decreased at ~160 ms after the Stop signal  
369 (CancelTime). While, one interpretation of this partial EMG activity is that it merely reflects  
370 ‘weak’ Go activation that did not run to completion, several lines of evidence strongly suggest it  
371 is a muscle manifestation of the stopped response. First, CancelTime had a strong positive  
372 correlation with SSRT<sub>Beh</sub>. Second, the variability of CancelTime was positively correlated with  
373 the variability of SSRT estimated from the BEESTS modeling framework. Third, the partial  
374 EMG activity had a profile which was initially similar to the EMG profile seen when actual  
375 keypresses were made, and only diverged at ~55 ms after EMG onset. This initial similarity

376 would not be expected if it were a weak Go activation – since previous research has  
377 demonstrated that weak and strong muscle activations have distinct profiles that diverge soon  
378 after onset<sup>39</sup>. Fourth, our TMS experiment demonstrated that, CancelTime coincided well with  
379 the timing of a putative basal ganglia-mediated global motor suppression<sup>25–30</sup>. This implies that  
380 the smaller amplitude and earlier decline of the partial EMG activity on Successful Stop was due  
381 to an active suppression of motor output. Fifth, across participants, on Successful Stop trials,  
382 CancelTime correlated strongly with the time of right frontal beta bursts (BurstTime) from scalp  
383 EEG. This is consistent with response inhibition being implemented via right prefrontal cortex<sup>12</sup>,  
384 and with previous research showing an increase of beta at right frontal electrode sites before  
385 SSRT<sub>Beh</sub><sup>32,33</sup>. Taken together, our results strongly suggest that CancelTime reflects the time of  
386 implementation of an active Stop process at the muscle-level. These results have striking  
387 theoretical and practical implications for response inhibition research and, more widely, our  
388 understanding of impulse control.

389         Notably, CancelTime was ~60 ms earlier than SSRT<sub>Beh</sub>. To better understand this  
390 discrepancy, we calculated SSRT based on the EMG response rather than behavior. We saw that  
391 SSRT<sub>EMG</sub> better matched CancelTime than did SSRT<sub>Beh</sub>. Thus, SSRT<sub>Beh</sub> could be an over-  
392 estimation of the duration of the Stop process in the brain. This extra time in SSRT<sub>Beh</sub> probably  
393 reflects a ‘ballistic stage’ in generation of the button press<sup>40,41</sup>. We suggest that the maximum  
394 CancelTime reflects the last point at which a Stop process can intervene to prevent responses.  
395 We note that CancelTime (a muscle measurement) is an overestimation of the brain’s stopping  
396 speed since it does not include the corticospinal conduction time, which we estimated at ~20 ms.  
397 Indeed, our TMS results show that global motor suppression, which we take as the time at which  
398 motor areas of the brain are suppressed, is ~140 ms (which is ~15 ms less than CancelTime).

399 One important consequence of our observation that the brain's stopping speed is  $\sim 140$  ms is that  
400 neural events that mediate stopping need to occur before this time. Indeed, we found that right  
401 frontal beta activity increased  $\sim 120$  ms after the Stop signal on Successful Stop trials, and also  
402 that, across participants, there was a strong positive relationship between mean BurstTime and  
403 mean CancelTime.

404 Taken together, these studies motivate a detailed model of the temporal events of action-  
405 stopping (Fig. 6). First, we suppose the right frontal beta bursts relate to activity of right inferior  
406 frontal gyrus<sup>12,31</sup>, and this happens in  $\sim 120$  ms, which then leads via basal ganglia<sup>29</sup> to global  
407 suppression of the primary motor cortex<sup>25-28,30</sup> at  $\sim 140$  ms. After a corticospinal conduction  
408 delay of  $\sim 20$  ms, this suppression of motor output is then reflected at  $\sim 160$  ms as a decline in  
409 muscle activity (CancelTime). Finally, SSRT<sub>Beh</sub> occurs at  $\sim 220$  ms, after, what we suppose is an  
410 electromechanical delay of  $\sim 60$  ms.

411

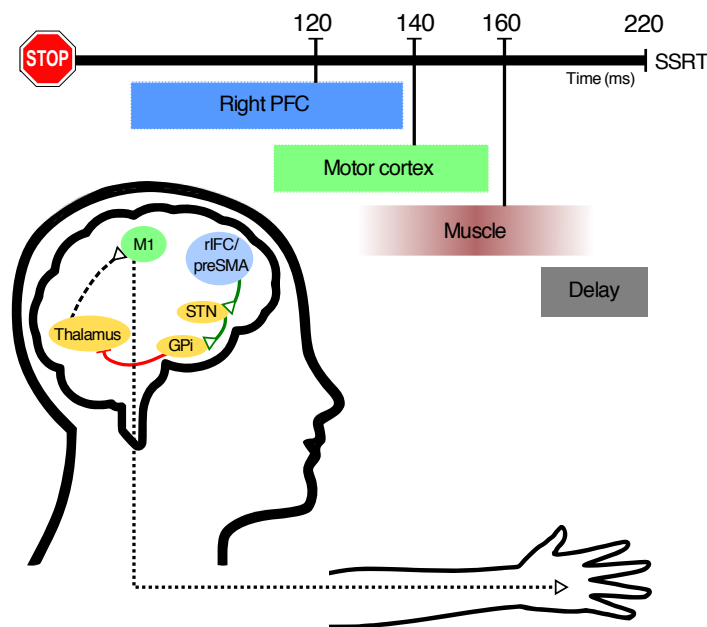

412

413

414 **Figure 6 | Hypothetical model of the temporal cascade of processes underlying human action-**  
415 **stopping.** Following the Stop signal, the right PFC including the rIFC and the preSMA gets activated  
416 at ~120 ms. These region/s activate the STN of the basal ganglia which in turn activates the globus  
417 pallidus interna which via its inhibition on the motor regions of the thalamus cuts down the ‘drive’ of  
418 the motor cortex. This results in a global motor suppression at ~140 ms after the Stop signal. This  
419 suppression is reflected in the hand muscle at ~160 ms which is measured as the CancelTime. There  
420 is a delay of ~60 ms at the muscle level which gets added to the behavioral estimate of SSRT.

421  
422 This model specifies the chronometrics of stopping in more detail than extant human  
423 models, and, more generally, raises questions about the timing reported in some other studies.  
424 For example, other research has shown that movement neurons in monkey Frontal Eye Field  
425 decrease activity <10 ms before SSRT<sup>42</sup>, dopaminergic neurons in rodent substantia nigra and  
426 striatum increase activity 12 ms prior to SSRT<sup>43</sup>, TMS at ~25 ms before SSRT over human  
427 Intraparietal Sulcus prolongs SSRT<sup>44</sup>, and that P300 human EEG activity ~300 ms after the Stop  
428 signal relates to stopping speed<sup>45</sup>. Our observations of shorter latencies for prefrontal bursts,  
429 TMS-MEP and muscle CancelTime, raise questions about what is reflected in these late neural  
430 activities.

431 Our results have several important implications. First, as just noted, they provide  
432 temporal constraints on neuroscience studies of stopping in the brain. They suggest that methods  
433 with high temporal resolution need to focus on the time after the Stop signal and before  
434 CancelTime (indeed CancelTime minus conduction time) rather than before SSRT<sub>Beh</sub>, and we  
435 provide a novel single-trial metric of stopping. Second, our results have clinical implications.  
436 Whereas meta-analysis shows that SSRT<sub>Beh</sub> is longer for patients (e.g. ADHD, OCD, and

437 substance use disorder) vs. controls<sup>6-11</sup>, not all such studies show differences<sup>8,46-48</sup>. We predict  
438 that our new single-trial method of CancelTime will be more sensitive than SSRT<sub>Beh</sub>.  
439 Furthermore, future studies can easily estimate within-subject variability in CancelTime, which  
440 will likely discriminate patients from controls. Third, our results provide insight into why  
441 SSRT<sub>Beh</sub> might only have a modest relationship with more ‘real-world’ measures of  
442 impulsivity<sup>15-20</sup>. As we show, the SSRT<sub>Beh</sub> includes not only CancelTime but an extra, and  
443 variable, 60 ms ballistic stage. We expect that future studies may show stronger correlations  
444 between CancelTime and self-report than that seen between SSRT<sub>Beh</sub> and self-report (also see<sup>15</sup>);  
445 likewise we predict that right frontal beta burst time might also correlate more tightly with self-  
446 report measures. More generally, the detailed timing information of frontal beta at ~120 ms,  
447 global motor suppression at ~140 ms, and CancelTime at ~160 ms points to subprocesses of  
448 action-stopping that provide potential biomarkers that could better explain individual differences  
449 in impulse control.

450         In conclusion, we provide a detailed timing model of action-stopping that partitions it  
451 into subprocesses that are isolable to different nodes and are surely more precise than the  
452 behavioral speed of stopping. At the core of this timing model is a novel method of measuring  
453 the speed of stopping from the muscles. This provides a single-trial estimate of stopping speed  
454 that could be easily measured with minimal equipment in any lab that studies human  
455 participants.

456

457 **Methods**



458 **Participants.** All were adult, healthy, human volunteers who provided written informed consent  
459 and were compensated at \$20/hour. The studies were approved by the UCSD Institutional  
460 Review Board.

461 *Study 1.* Ten participants (4 females; age  $22 \pm 1$  years; all right-handed).

462 *Study 2.* Thirty-six participants (19 females; age  $19 \pm 0.4$  years; all right-handed). Two  
463 were excluded for bad behavior (violating the assumptions of the independent race model -  
464 Failed Stop RT < Correct Go RT, and P(Stop) increasing monotonically as a function of SSD),  
465 and two were excluded for noisy EMG data.

466 *Study 3 (TMS):* Eighteen participants (11 females; age  $19 \pm 0.4$  years; 15 right-handed, 2  
467 left-handed) with no contraindications to TMS<sup>49</sup>. One was excluded for bad behavior.

468 *Study 4 (EEG).* Eleven participants (6 females, age  $19 \pm 0.4$  years, all right-handed)  
469 participated.

470 *Study 5 (EEG):* Fifteen participants (9 females, age  $21 \pm 0.4$  years, all right-handed)  
471 participated. Two were excluded from analysis, one for misaligned EEG markers due to a  
472 technical issue, while the other lacked a right frontal brain IC, based on our standard method<sup>32,33</sup>.

473

474 **Stop-signal task.** This was run with MATLAB 2014b (Mathworks, USA) and Psychtoolbox<sup>50</sup>.

475 Each trial began with a white square appearing at the center of the screen for  $500 \pm 50$  ms. Then a  
476 right or left white arrow appeared at the center. When the left arrow appeared, participants had to  
477 press a key on a vertically oriented keypad using their index finger, while for a right arrow they  
478 had to press down on a key on a horizontally oriented keypad with their pinky finger (Fig. 1b  
479 *inset*), as fast and as accurately as possible (Go trials). The stimuli remained on the screen for 1  
480 s. If participants did not respond within this time, the trial aborted, and 'Too Slow' was

481 presented. On 25% of the trials, the arrow turned red after a stop signal delay (SSD), and  
482 participants tried to stop the response (Stop trials). The SSD was adjusted using two independent  
483 staircases (for right and left directions), where the SSD increased and decreased by 50 ms  
484 following a Successful Stop and Failed Stop respectively. Each trial was followed by an inter-  
485 trial interval (ITI) and the entire duration of each trial including the ITI is 2.5 s (Fig. 1a).

486 *Study 1 and 2.* Participants performed the task with their right hand. They performed 40 practice  
487 trials before the actual experiment, where their baseline SSD was determined and was  
488 subsequently used as the starting SSD in the main experiment. In study 1 and 2, the experiment  
489 had 600 trials divided in 15 blocks, such that each block had 40 trials (450 Go trial and 150 Stop  
490 trials). At the end of each block the participants were presented a figure showing their mean  
491 reaction times (RT) in each block. Participants were verbally encouraged to maintain their mean  
492 reaction time constant across the different blocks and between 0.4 – 0.6 s.

493 *Study 3.* Participants performed the task with their left hand. Following 48 practice trials without  
494 TMS, participants performed 12 blocks of the experiment with TMS, with each block consisting  
495 of 96 trials each (72 Go trials and 24 Stop trials).

496 *Study 4.* Participants performed the task with their right hand. Following 160 practice trials,  
497 participants performed 4 blocks of 80 trials (240 Go trials and 80 Stop trials).

498 *Study 5.* Participants performed the task with their right hand. Following 80 practice trials,  
499 participants 24 blocks of 80 trials each (1440 Go trials and 480 Stop trials).

500

501 **EMG recording.** EMG data were acquired using a Grass QP511 AC amplifier (Glass  
502 Technologies, West Warwick, RI) with a frequency cut-off between 30 and 1000 Hz. A CED  
503 Micro 1401 mk II acquisition system sampled the data at 2 kHz. The EMG data were acquired by

504 CED Signal v4 software (Cambridge Electronic Design Limited, Cambridge, UK) for 2 s  
505 following the fixation cue. The data acquisition was triggered from MATLAB using a USB-  
506 1208FS DAQ card (Measuring Computing, Norton, MA). In all 5 experiments, surface EMG  
507 was recorded from both the first dorsal interossei (FDI) and the abductor digiti minimi (ADM)  
508 muscles of the hand (Fig. 1b *inset*). In the TMS experiment, surface EMG was also recorded  
509 from the task-irrelevant right extensor carpi radialis (ECR) muscle (Fig. 5a).

510

511 **TMS.** MEPs were evoked using a TMS device (PowerMag Lab 100, MAG&More GMBH,  
512 Munich, Germany) delivering full sine wave pulses, and connected to a figure-of-eight coil (70  
513 mm diameter, Double coil PMD70-pCool; MAG&More GMBH, Munich, Germany). During the  
514 task, the coil was positioned on the scalp over the left primary motor cortex representation of the  
515 ECR muscle and oriented so that the coil handle was approximately perpendicular to the central  
516 sulcus, *i.e.* at  $\sim 45^\circ$  to the mid-sagittal line, and the initial phase of current induced in the brain  
517 was posterior-to-anterior across the central sulcus. Prior to the experiment, the motor hot spot  
518 was determined as the position on the scalp where slightly supra-threshold stimuli produced the  
519 largest and most consistent MEPs in ECR. The position was marked on a cap worn by the  
520 participants. Resting motor threshold (RMT) was defined as the lowest intensity to evoke an  
521 MEP of at least 0.05 mV in 5 of 10 consecutive trials while participants were at rest. We then  
522 established the test stimulus intensity to be used during task, which was set to produce a mean  
523 MEP amplitude of approximately 0.2 - 0.5 mV whilst the participant was at rest.

524 MEPs were also evoked in the left FDI muscle prior to beginning the main experiment  
525 for the purpose of recording the corticospinal conduction time. The motor hot spot for the FDI  
526 was defined in a manner similar to that for the ECR. The active motor threshold (AMT) was

527 defined as the lowest intensity to evoke a discernible MEP in 5 of 10 consecutive trials, while  
528 participants maintained slight voluntary contraction (~10% of maximum voluntary EMG  
529 amplitude during isometric finger abduction). Then, 10 stimuli were delivered at 150% AMT  
530 during slight voluntary contraction (again 10% of maximum), with the coil oriented to induce  
531 lateral-medial current in the brain in order to obtain estimates of corticospinal conduction time.

532 During the task, TMS stimuli were delivered on every Stop trial and on 50% of Go trials.  
533 On every Stop trial, a single TMS stimulus at the test stimulus intensity was delivered at one of  
534 six time points: inter-trial interval (100 ms prior to fixation; ITI), 100 ms, 120 ms, 140 ms, 160  
535 ms and 180 ms after the Stop signal (Fig. 4a). On the Go trials, TMS stimuli were yoked to the  
536 time of the Stop signal on the previous Stop trial. Thus, there were 48 trials per TMS time point  
537 on Stop trials and 96 trials per time point on Go trials.

538

539 **EEG.** 64 channel EEG (Easycap, Brainvision LLC) was recorded in the standard 10/20  
540 configuration at 1 kHz.

541

542 **Data analysis.** All analyses were performed using MATLAB (R2016b, R2018b, R2019a).

543 *Stop Signal Reaction Time.* SSRT from the behavioral responses ( $SSRT_{Beh}$ ) was determined  
544 using the integration method<sup>5</sup>. When calculating SSRT using the EMG responses,  $SSRT_{EMG}$ , as  
545 the  $P(\text{Respond}|\text{Stop})$  was often much more than 0.5, we calculated the SSRT individually for the  
546 3 most frequent SSDs and then averaged it<sup>51</sup>.

547 *EMG data analysis.* EMG data were filtered using 4<sup>th</sup> order Butterworth filter (roll-off 24  
548 dB/octave) to remove 60 Hz noise and its harmonics at 120, and 180 Hz. EMG data were full-  
549 wave rectified and the root-mean square (RMS) of the signal was computed using a centered

550 window of 50 ms. Any EMG activity which was greater than 8 SD of the mean EMG activity in  
551 the baseline period (Fixation to Go cue) was marked, on a trial-by-trial basis. Starting from the  
552 peak of that EMG activity, the onset was marked at the point where the activity dropped below  
553 20% of the peak for 5 consecutive ms. This method of adjusting the threshold based on the peak  
554 EMG activity, allowed better onset detection than a fixed threshold, especially when the  
555 amplitude of the EMG activity was small. The time when EMG started to decline was  
556 determined as the time when, following the peak EMG activity, the activity decreased for 5  
557 consecutive ms. Visual inspection of individual trials showed that this method provided a reliable  
558 detection of both EMG onsets (see Supplementary Fig. 1a, 1b for EMG onset vs. RT correlation)  
559 and decline. Any detected EMG timing which was beyond 1.5 times the inter-quartile range  
560 (IQR) of the first and third quartile (Q3) of that particular timing distribution was deemed an  
561 outlier. This removed <4% trials. CancelTime was marked as the time of the decline following  
562 the Stop signal. For outlier rejection, CancelTimes had a lower cutoff of 50 ms and higher cutoff  
563 of  $Q3+1.5\times IQR$ . This removed <3% trials.

564 As the peak EMG amplitude for the FDI and ADM muscle were quite distinct, before  
565 averaging the two EMG activities, we normalized the muscle activity by the peak activity in that  
566 particular muscle ( $Voltage_{Norm}$  in Fig. 2a, 2b, 3c, Supplementary Fig. 1c).

567 *Global MEP suppression.* MEP amplitudes were measured on a trial-by-trial basis. Data were  
568 included for analysis if the following criteria were met: (i) the amplitude of the ECR EMG signal  
569 in a 90 ms period prior to the TMS stimulus was < 0.05 mV; (ii) the amplitude of the MEP fell  
570 within the  $mean\pm 1.5\times IQR$  of values for the same time point and trial type (Correct Go, Failed  
571 Stop, Successful Stop). Thereafter, MEP amplitudes measured at the ITI were collapsed across  
572 trial type (Correct Go, Failed Stop and Successful Stop), averaged and used as a baseline against

573 which to compare other TMS time points. For each of the other TMS time points (100, 120, 140,  
574 160, 180 ms following the Stop signal), data were averaged within each trial type (Correct Go,  
575 Failed stop, Successful Stop) and expressed as a percentage of the mean ITI MEP amplitude.  
576 *Corticospinal conduction time.* Corticospinal conduction time was determined by delivering  
577 TMS over the hand representation of left FDI and measuring MEP from the muscle (Fig. 4c).  
578 The earliest MEP onset latency across 10 trials was identified by visual inspection of the EMG  
579 traces<sup>52-54</sup>.

580 *Trial-by-trial analysis of the time of the CancelTime and time of global motor suppression.* To  
581 compare the temporal association between the EMG decline and MEP suppression, we  
582 performed a trial-by-trial analysis of stop-signal task data only on trials where an EMG burst was  
583 detected. We first normalized the time of TMS on a given trial by subtracting the time of EMG  
584 decline from the time of the TMS pulse. Hence, negative values mean that TMS was delivered  
585 before the EMG decline and positive values mean that TMS was delivered after. We then plotted  
586 MEP amplitudes for each of the three response types (Correct Go, Failed Stop, and Successful  
587 Stop) against the normalized times binned into 30 ms windows. This analysis meant that for a  
588 given individual there were relatively few trials per time bin, and some bins would occasionally  
589 contain no data. Therefore, we combined data across all individuals. Prior to this, MEP  
590 amplitudes for each individual were normalized to the mean MEP amplitude at the inter-trial  
591 interval, to account for inter-individual variability in absolute MEP amplitudes at baseline. We  
592 restricted our analysis to time bins that contained at least 50 trials, which resulted in time range -  
593 90 ms to 60 ms.

594 *EEG Preprocessing.* We used EEGLAB<sup>55</sup> and custom-made scripts to analyze the data. The data  
595 were downsampled to 512 Hz and band-pass filtered between 2-100 Hz. A 60 Hz and 180 Hz

596 FIR notch filter were applied to remove line noise and its harmonics. EEG data were then re-  
597 referenced to the average. The continuous data were visually inspected to remove bad channels  
598 and noisy stretches.

599 *ICA analysis.* The noise-rejected data were then subjected to logistic Infomax ICA to isolate  
600 independent components (ICs) for each participant separately<sup>38</sup>. We then computed the best-  
601 fitting single equivalent dipole matched to the scalp projection for each IC using the DIPFIT  
602 toolbox in EEGLAB<sup>55,56</sup>. ICs representing non-brain activity related to eye movements, muscle,  
603 and other sources were first identified using the frequency spectrum (increased power at high  
604 frequencies), scalp maps (activity outside the brain) and the residual variance of the dipole  
605 (greater than 15%) and then, subtracted from the data. A putative right frontal IC was then  
606 identified from the scalp maps (if not present then we used frontal topography) and the channel  
607 data were projected onto the corresponding right frontal IC. The data on Successful Stop trials  
608 were then epoched from -1.5 s to 1.5 s aligned to the Stop signal. We estimated the time-  
609 frequency maps from 4 to 30 Hz, and -100 to 400 ms using Morlet wavelets with 3 cycles at low  
610 frequencies linearly increasing by 0.5 at higher frequencies. The IC was selected only if there  
611 was a beta power (13 to 30 Hz) increase in the window between the Stop signal and SSRT<sub>Beh</sub>  
612 compared to a time-window *prior to the Go* cue (-1000 to -500 ms aligned to Stop signal). In  
613 each participant, the beta frequency which had the maximum power in this time window was  
614 used in the beta bursts computation (Supplementary Fig. 3).

615 *Beta Bursts.* To estimate the beta bursts, the epoched data were first filtered at the peak beta  
616 frequency using a frequency domain Gaussian window with full-width half-maximum of 5 Hz.  
617 The complex analytic envelope was then obtained by Hilbert transform, and its absolute value  
618 provided the power estimate. In each participant, to define the burst threshold, the beta amplitude

619 within a period of 500 to 1000 ms (*i.e.* after the Stop signal in the Stop trials, and after the mean  
620 SSD in the Correct Go trials) was pooled across all trials [compared to the ICA analysis here we  
621 picked a different time-window to estimate the burst threshold to keep the analysis unbiased.  
622 However, picking the same time-window also yielded similar results]. The threshold was set as  
623 the median + 1.5 SD of the beta amplitude distribution (Supplementary Fig. 4). Once the burst  
624 was detected, the burst width threshold was set as the median + 1 SD. We binary-coded each  
625 time point where the beta amplitude crossed the burst width threshold to compute the burst %  
626 across trials. For each detected burst, the time of the peak beta amplitude was marked as the  
627 BurstTime.

628

629 **Statistical analysis.** For pairwise comparisons, the data were first checked for normality using  
630 Lilliefors test, and if normally distributed a two-tailed *t*-test (*t*-statistic) was performed, else a  
631 Wilcoxon signed rank test (*Z*-statistic) was performed. We interpret the effect sizes as small  
632 (Cohen's *d*: 0.2-0.5; Bayes Factor in favor of the alternate hypothesis,  $BF_{10}$ : 1-3), medium (*d*:  
633 0.5-0.8;  $BF_{10}$ : 3-10), large ( $d > 0.8$ ;  $BF_{10} > 10$ ). For comparisons across multiple levels, repeated-  
634 measures ANOVA was used, followed by Bonferroni corrected *t*-tests for pairwise comparisons  
635 (Bonferroni corrected *p*-value:  $p_{Bon}$ ). The Greenhouse-Geisser correction was applied where the  
636 assumption of sphericity in ANOVA was violated (corrected *F*-statistic:  $F_{GG}$ ). Effect sizes for  
637 ANOVAs were interpreted as small (partial eta-squared,  $\eta_p^2$ : 0.01-0.06), medium ( $\eta_p^2$ : 0.06-  
638 0.14), and large ( $\eta_p^2 > 0.14$ ). For correlational analyses, Pearson's correlation coefficient (*r*) was  
639 usually used, but Spearman's correlation coefficient ( $\rho$ ) was used when the data bounded in a  
640 closed interval. All data are presented as mean $\pm$ s.e.m.



641 In testing the relationship between BurstTime and CancelTime, we performed a  
642 permutation test. We sampled BurstTimes randomly from a uniform distribution between 0 and  
643 SSRT<sub>Beh</sub> for a given participant for 3000 iterations. For each iteration, we then computed the  
644 correlation ( $r$ ) between the mean BurstTime and the mean CancelTime across participants. This  
645 generated a distribution of  $r$  ranging between -1 and 1. The  $p$ -value for our analysis was  
646 determined as the  $P(r \geq r_{obs} | H_0)$  in the permuted data.

647

### 648 **Bayesian modelling of behavioral data**

649 We used the BEESTs model developed by Dora Matzke and colleagues (run in R Studio  
650 1.1.463) which assumes a race between two stochastically independent process, a Go and a Stop  
651 processes. This model estimates the distribution of the SSRT by using the participant's Go RT  
652 distribution, and by considering the Failed Stop RTs as a censored Go RT distribution. The  
653 censoring points are sampled randomly from the SSRT distribution on each Stop trial. The RT  
654 distributions underlying the Go and Stop process is assumed to have a Gaussian and an  
655 exponential component and is described 3 parameters ( $\mu_{Go}$ ,  $\sigma_{Go}$ ,  $\tau_{Go}$  and  $\mu_{Stop}$ ,  $\sigma_{Stop}$ ,  $\tau_{Stop}$ ). For  
656 such ex-Gaussian distributions, the mean and variance of the RT distribution are determined as  $\mu$   
657 +  $\tau$  and  $\mu^2 + \tau^2$ , respectively. The model also estimates the probability of trigger failures for each  
658 participant. The model uses Bayesian Parametric Method (BPE) to estimate the parameters of the  
659 distributions. We used a hierarchical BPE, where individual subject parameters are modeled with  
660 the group-level distributions. This approach is thought to be more accurate than fitting individual  
661 participants and is effective when there is less data per participant<sup>57</sup>. We pooled the subjects  
662 across both study 1 and 2 to estimate the individual parameters. The priors were bounded  
663 uniform distributions ( $\mu_{Go}$ ,  $\mu_{Stop}$ :  $U(0,2)$ ;  $\sigma_{Go}$ ,  $\sigma_{Stop}$ :  $U(0,0.5)$   $\tau_{Go}$ ,  $\tau_{Stop}$ :  $U(0,0.5)$ ; pTF:  $U(0,1)$ ).

664 The posterior distributions were estimated using the Metropolis-within-Gibbs sampling and we  
665 ran multiple chains. We ran the model for 5000 samples with a thinning of 5. The Gelman-Rubin  
666 ( $\hat{R}$ ) statistic was used to estimate the convergence of the chain. Chains were considered  
667 converged if  $\hat{R} < 1.1$ .

668

## 669 **Acknowledgements**

670 We thank Dora Matkze for sharing the scripts for BEESTS modelling, Sven Bestmann  
671 for insightful comments on data, Simon Little for sharing the beta-burst analysis script, Kelsey  
672 Sundby for sharing some EEG and EMG data, and Xinze Yu and Hunter Robbins for help in data  
673 recording. We gratefully acknowledge our support from NIH: NS106822 and DA026452.

674

## 675 **Author contributions**

676 S.J., R.H., V.M., and A.R.A conceived the experiments; S.J., R.H., and V.M. recorded  
677 and analyzed the data; S.J., R.H., V.M., and A.R.A wrote the paper.

678

## 679 **Competing interests**

680 The authors declare no competing financial interests.

681

## 682 **Data and scripts**

683 A core element of this paper is a novel method of calculating single-trial stopping speed  
684 from EMG. Accordingly, we provide the EMG and behavioral data from 10 participants in study  
685 1, along with analysis scripts, and a brief description of how to execute the scripts

686 (<https://osf.io/b2ng5/>). Upon acceptance of the paper all EMG, TMS-MEP and EEG data will be

687 provided at the above link.

688

## 689 **References**

- 690 1. Wagner, J., Makeig, S., Gola, M., Neuper, C. & Müller-Putz, G. Distinct  $\beta$  Band  
691 Oscillatory Networks Subserving Motor and Cognitive Control during Gait Adaptation. *J.*  
692 *Neurosci.* **36**, 2212–26 (2016).
- 693 2. Sedgmond, J. *et al.* Prefrontal brain stimulation during food-related inhibition training:  
694 effects on food craving, food consumption and inhibitory control. *R. Soc. Open Sci.* **6**,  
695 181186 (2019).
- 696 3. Xue, G., Aron, A. R. & Poldrack, R. A. Common Neural Substrates for Inhibition of  
697 Spoken and Manual Responses. *Cereb. Cortex* **18**, 1923–1932 (2008).
- 698 4. Aron, A. R. The neural basis of inhibition in cognitive control. *Neuroscientist* **13**, 214–228  
699 (2007).
- 700 5. Verbruggen, F. *et al.* A consensus guide to capturing the ability to inhibit actions and  
701 impulsive behaviors in the stop-signal task. *Elife* **8**, (2019).
- 702 6. Bari, A. & Robbins, T. W. Inhibition and impulsivity: Behavioral and neural basis of  
703 response control. *Prog. Neurobiol.* **108**, 44–79 (2013).
- 704 7. Alderson, R. M., Rapport, M. D. & Kofler, M. J. Attention-Deficit/Hyperactivity Disorder  
705 and Behavioral Inhibition: A Meta-Analytic Review of the Stop-signal Paradigm. *J.*  
706 *Abnorm. Child Psychol.* **35**, 745–758 (2007).
- 707 8. Smith, J. L., Mattick, R. P., Jamadar, S. D. & Iredale, J. M. Deficits in behavioural  
708 inhibition in substance abuse and addiction: A meta-analysis. *Drug Alcohol Depend.* **145**,  
709 1–33 (2014).

- 710 9. Lijffijt, M., Kenemans, J. L., Verbaten, M. N. & van Engeland, H. A Meta-Analytic  
711 Review of Stopping Performance in Attention-Deficit/Hyperactivity Disorder: Deficient  
712 Inhibitory Motor Control? *J. Abnorm. Psychol.* **114**, 216–222 (2005).
- 713 10. Snyder, H. R., Kaiser, R. H., Warren, S. L. & Heller, W. Obsessive-Compulsive Disorder  
714 Is Associated With Broad Impairments in Executive Function. *Clin. Psychol. Sci.* **3**, 301–  
715 330 (2015).
- 716 11. Lavagnino, L., Arnone, D., Cao, B., Soares, J. C. & Selvaraj, S. Inhibitory control in  
717 obesity and binge eating disorder: A systematic review and meta-analysis of  
718 neurocognitive and neuroimaging studies. *Neurosci. Biobehav. Rev.* **68**, 714–726 (2016).
- 719 12. Aron, A. R., Robbins, T. W. & Poldrack, R. A. Inhibition and the right inferior frontal  
720 cortex: One decade on. *Trends Cogn. Sci.* **18**, 177–185 (2014).
- 721 13. Schall, J. D. & Godlove, D. C. Current advances and pressing problems in studies of  
722 stopping. *Curr. Opin. Neurobiol.* **22**, 1012–1021 (2012).
- 723 14. Casey, B. J. *et al.* The Adolescent Brain Cognitive Development (ABCD) study: Imaging  
724 acquisition across 21 sites. *Dev. Cogn. Neurosci.* **32**, 43–54 (2018).
- 725 15. Skippen, P. *et al.* Reliability of triggering inhibitory process is a better predictor of  
726 impulsivity than SSRT. *Acta Psychol. (Amst)*. **192**, 104–117 (2019).
- 727 16. Lijffijt, M. *et al.* Differences between low and high trait impulsivity are not associated  
728 with differences in inhibitory motor control. *J. Atten. Disord.* **8**, 25–32 (2004).
- 729 17. Chowdhury, N. S., Livesey, E. J., Blaszczyński, A. & Harris, J. A. Pathological Gambling  
730 and Motor Impulsivity: A Systematic Review with Meta-Analysis. *J. Gambl. Stud.* **33**,  
731 1213–1239 (2017).
- 732 18. Friedman, N. P. & Miyake, A. The Relations Among Inhibition and Interference Control

- 733 Functions: A Latent-Variable Analysis. *J. Exp. Psychol. Gen.* **133**, 101–135 (2004).
- 734 19. McLaughlin, N. C. R. *et al.* Stop Signal Reaction Time Deficits in a Lifetime Obsessive-  
735 Compulsive Disorder Sample. *J. Int. Neuropsychol. Soc.* **22**, 785–789 (2016).
- 736 20. Enkavi, A. Z. *et al.* Large-scale analysis of test-retest reliabilities of self-regulation  
737 measures. *Proc. Natl. Acad. Sci. U. S. A.* **116**, 5472–5477 (2019).
- 738 21. Bissett, P., Poldrack, R. & Logan, G. D. Severe violations of independence in response  
739 inhibition tasks are pervasive and consequential. doi:10.31234/OSF.IO/KPA65
- 740 22. Raud, L. & Huster, R. J. The Temporal Dynamics of Response Inhibition and their  
741 Modulation by Cognitive Control. *Brain Topogr.* **30**, 486–501 (2017).
- 742 23. Coxon, J. P., Stinear, C. M. & Byblow, W. D. Intracortical Inhibition During Volitional  
743 Inhibition of Prepared Action. *J. Neurophysiol.* **95**, 3371–3383 (2006).
- 744 24. van den Wildenberg, W. P. M. *et al.* Mechanisms and Dynamics of Cortical Motor  
745 Inhibition in the Stop-signal Paradigm: A TMS Study. *J. Cogn. Neurosci.* **22**, 225–239  
746 (2010).
- 747 25. Badry, R. *et al.* Suppression of human cortico-motoneuronal excitability during the Stop-  
748 signal task. *Clin. Neurophysiol.* **120**, 1717–1723 (2009).
- 749 26. Wessel, J. R., Reynoso, H. S., Aron, A. R., Sequoyah Reynoso, H. & Aron, A. R. Saccade  
750 suppression exerts global effects on the motor system. *J. Neurophysiol.* **110**, 883–90  
751 (2013).
- 752 27. Cai, W., Oldenkamp, C. L. & Aron, A. R. Stopping speech suppresses the task-irrelevant  
753 hand. *Brain Lang.* **120**, 412–5 (2012).
- 754 28. Wessel, J. R. & Aron, A. R. Unexpected events induce motor slowing via a brain  
755 mechanism for action-stopping with global suppressive effects. *J. Neurosci. Off. J. Soc.*

- 756           *Neurosci.* **33**, 18481–18491 (2013).
- 757   29.   Wessel, J. R. *et al.* Stop-related subthalamic beta activity indexes global motor  
758           suppression in Parkinson’s disease. *Mov. Disord.* **31**, 1846–1853 (2016).
- 759   30.   Wessel, J. R. & Aron, A. R. On the Globality of Motor Suppression: Unexpected Events  
760           and Their Influence on Behavior and Cognition. *Neuron* **93**, 259–280 (2017).
- 761   31.   Swann, N. *et al.* Intracranial EEG reveals a time- and frequency-specific role for the right  
762           inferior frontal gyrus and primary motor cortex in stopping initiated responses. *J.*  
763           *Neurosci.* **29**, 12675–85 (2009).
- 764   32.   Wagner, J., Wessel, J. R., Ghahremani, A. & Aron, A. R. Establishing a Right Frontal  
765           Beta Signature for Stopping Action in Scalp Electroencephalography: Implications for  
766           Testing Inhibitory Control in Other Task Contexts. *J. Cogn. Neurosci.* 1–12 (2017).  
767           doi:10.1162/jocn\_a\_01183
- 768   33.   Castiglione, A., Wagner, J., Anderson, M. & Aron, A. R. Preventing a Thought from  
769           Coming to Mind Elicits Increased Right Frontal Beta Just as Stopping Action Does.  
770           *Cereb. Cortex* **29**, 2160–2172 (2019).
- 771   34.   McGarry, T., Inglis, J. T. & Franks, I. M. Against a Final Ballistic Process in the Control  
772           of Voluntary Action: Evidence Using the Hoffmann Reflex. *Motor Control* **4**, 469–485  
773           (2000).
- 774   35.   Little, S., Bonaiuto, J., Barnes, G. & Bestmann, S. Motor cortical beta transients delay  
775           movement initiation and track errors. *bioRxiv* 384370 (2018). doi:10.1101/384370
- 776   36.   Matzke, D., Love, J. & Heathcote, A. A Bayesian approach for estimating the probability  
777           of trigger failures in the stop-signal paradigm. *Behav. Res. Methods* **49**, 267–281 (2017).
- 778   37.   Shin, H., Law, R., Tsutsui, S., Moore, C. I. & Jones, S. R. The rate of transient beta

- 779 frequency events predicts behavior across tasks and species. *Elife* **6**, 1–31 (2017).
- 780 38. Bell, A. J. & Sejnowski, T. J. An Information-Maximization Approach to Blind  
781 Separation and Blind Deconvolution. *Neural Comput.* **7**, 1129–1159 (1995).
- 782 39. Bellumori, M., Jaric, S. & Knight, C. A. The rate of force development scaling factor  
783 (RFD-SF): protocol, reliability, and muscle comparisons. *Exp. Brain Res.* **212**, 359–369  
784 (2011).
- 785 40. De Jong, R., Coles, M. G., Logan, G. D. & Gratton, G. In search of the point of no return:  
786 the control of response processes. *J. Exp. Psychol. Hum. Percept. Perform.* **16**, 164–182  
787 (1990).
- 788 41. Jana, S. & Murthy, A. Task context determines whether common or separate inhibitory  
789 signals underlie the control of eye-hand movements.  
790 <https://doi.org/10.1152/jn.00085.2018> (2018). doi:10.1152/JN.00085.2018
- 791 42. Hanes, D. P., Patterson, W. F. & Schall, J. D. Role of frontal eye fields in countermanding  
792 saccades: visual, movement, and fixation activity. *J. Neurophysiol.* **79**, 817–834 (1998).
- 793 43. Ogasawara, T., Nejime, M., Takada, M. & Matsumoto, M. Primate Nigrostriatal  
794 Dopamine System Regulates Saccadic Response Inhibition. *Neuron* **100**, 1513-1526.e4  
795 (2018).
- 796 44. Osada, T. *et al.* An essential role of the intraparietal sulcus in response inhibition  
797 predicted by parcellation-based network. *J. Neurosci.* **39**, 2244–18 (2019).
- 798 45. Wessel, J. R. & Aron, A. R. It’s not too late: The onset of the frontocentral P3 indexes  
799 successful response inhibition in the stop-signal paradigm. *Psychophysiology* **52**, 472–480  
800 (2015).
- 801 46. Clark, L. *et al.* Association Between Response Inhibition and Working Memory in Adult

- 802 ADHD: A Link to Right Frontal Cortex Pathology? *Biol. Psychiatry* **61**, 1395–1401  
803 (2007).
- 804 47. Kalanthroff, E. *et al.* The Role of Response Inhibition in Medicated and Unmedicated  
805 Obsessive-Compulsive Disorder Patients: Evidence from the Stop-Signal Task. *Depress.*  
806 *Anxiety* **34**, 301–306 (2017).
- 807 48. Lipszyc, J. & Schachar, R. Inhibitory control and psychopathology: A meta-analysis of  
808 studies using the stop signal task. *J. Int. Neuropsychol. Soc.* **16**, 1064–1076 (2010).
- 809 49. Rossi, S., Hallett, M., Rossini, P. M. & Pascual-Leone, A. Screening questionnaire before  
810 TMS: An update. *Clin. Neurophysiol.* **122**, 1686 (2011).
- 811 50. Brainard, D. H. The Psychophysics Toolbox. *Spat. Vis.* **10**, 433–436 (1997).
- 812 51. Verbruggen, F. & Logan, G. D. Models of response inhibition in the stop-signal and stop-  
813 change paradigms. *Neurosci. Biobehav. Rev.* **33**, 647–661 (2009).
- 814 52. Hamada, M., Murase, N., Hasan, A., Balaratnam, M. & Rothwell, J. The role of  
815 interneuron networks in driving human motor cortical plasticity. *Cereb. Cortex* **23**, 1593–  
816 1605 (2013).
- 817 53. Hannah, R. & Rothwell, J. Pulse Duration as Well as Current Direction Determines the  
818 Specificity of Transcranial Magnetic Stimulation of Motor Cortex during Contraction.  
819 *Brain Stimul.* **10**, 106–115 (2017).
- 820 54. Rossini, P. M. *et al.* Non-invasive electrical and magnetic stimulation of the brain, spinal  
821 cord, roots and peripheral nerves: Basic principles and procedures for routine clinical and  
822 research application: An updated report from an I.F.C.N. Committee. *Clinical*  
823 *Neurophysiology* **126**, 1071–1107 (2015).
- 824 55. Delorme, A. & Makeig, S. EEGLAB: an open source toolbox for analysis of single-trial



- 825 EEG dynamics including independent component analysis. *J. Neurosci. Methods* **134**, 9–  
826 21 (2004).
- 827 56. Oostenveld, R. & Oostendorp, T. F. Validating the boundary element method for forward  
828 and inverse EEG computations in the presence of a hole in the skull. *Hum. Brain Mapp.*  
829 **17**, 179–192 (2002).
- 830 57. Matzke, D., Dolan, C. V., Logan, G. D., Brown, S. D. & Wagenmakers, E.-J. J. Bayesian  
831 parametric estimation of stop-signal reaction time distributions. *J. Exp. Psychol. Gen.* **142**,  
832 1047–1073 (2013).
- 833
- 834
